# Supplementary material
Source: HighWire-hosted journal article supplement (http://jpet.aspetjournals.org/highwire/filestream/136390/field_highwire_adjunct_files/0/JPET204735_SupplementalData.pdf)
Supplement: JPET204735_SupplementalData.pdf [file JPET204735_SupplementalData.pdf]

## Supplemental Data

### Materials and Methods

**Synthesis and characterization of *N*-{(3*R*,4*S*)-3-[4-(5-cyano-2-thienyl)phenyl]tetrahydro-2*H*-pyran-4-yl}propane-2-sulfonamide (PF-4778574).** A mixture of *N*-[(3*R*,4*S*)-3-(4-iodophenyl)tetrahydro-2*H*-pyran-4-yl]propane-2-sulfonamide (25 mmol), 5-cyanothiophene-2-boronic acid pinacol boronate ester (30 mmol), (1,1'-bis(diphenylphosphino)ferrocene)palladium(II) chloride (1.3 mmol) and tribasic potassium phosphate (75 mmol) in 20% H<sub>2</sub>O in 2-methyl-THF (125 mL) was evacuated and backfilled with N<sub>2</sub> three times. The reaction was heated to 75 °C until starting material was consumed, as determined by the periodic HPLC analysis of reaction mixture aliquots, and then concentrated *in vacuo*. The residue was reconstituted in H<sub>2</sub>O and extracted with EtOAc, the pooled organic extract was washed with saturated aqueous NaCl, dried over MgSO<sub>2</sub>, filtered and concentrated by rotary evaporation. The residue was purified by flash chromatography using a 120 g silica gel RediSep<sup>®</sup> column (eluant: 20–100% EtOAc in heptane) to afford PF-4778574 (9.7 g, 99%) as a pale yellow foam. Mp: 118–120 °C; <sup>1</sup>H NMR (400 MHz, CDCl<sub>3</sub>) δ 0.84 (d, *J* = 6.4 Hz, 3H), 1.13 (d, *J* = 7.2 Hz, 3H), 1.77 (m, 1H), 2.29 (m, 1H), 2.60 (m, 1H), 2.75 (td, *J* = 10.8, 10.8, 4.4 Hz, 1H), 3.46 (t, *J* = 11.2 Hz, 1H), 3.57 (ddd, apparent td, *J* = 12.0, 12.0, 1.6 Hz, 1H), 3.71 (m, 1H), 3.95 (dd, *J* = 11.6, 4.8 Hz, 1H), 4.05 (dd, *J* = 12.0, 4.4 Hz, 1H), 4.12 (d, *J* = 8.0 Hz, 1H), 7.25 (d, *J* = 3.6 Hz, 1H), 7.31 (d, *J* = 8.4 Hz, 2H), 7.56 (d, *J* = 8.0 Hz, 2H), 7.58 (d, *J* = 4.0 Hz, 1H); <sup>13</sup>C NMR (100 MHz, CDCl<sub>3</sub>) δ 16.3, 16.4, 36.1, 50.2, 54.3, 55.6, 67.4, 72.7, 108.7, 114.5, 123.6, 127.0, 129.5, 132.0, 138.7, 140.2, 151.2; ESI: [M-H]<sup>+</sup> = 389.2; elemental analysis

Shaffer CL, Hurst RS, Scialis RJ, Osgood SM, Bryce DK, Hoffmann WE, Lazzaro JT, Hanks AN, Lotarski S, Weber ML, Liu J, Menniti FS, Schmidt CJ and Hajós M  
Positive Allosteric Modulation of AMPA Receptors From Efficacy to Toxicity: The Interspecies Exposure-Response Continuum of the Novel Potentiator PF-4778574  
The Journal of Pharmacology and Experimental Therapeutics

calculated for  $C_{19}H_{22}N_2O_3S_2$  C: 58.44, H: 5.68, N: 7.17; found, C: 58.38, H: 5.55, N: 7.16;

optical rotation:  $+0.226^\circ$ ;  $[\alpha]^{20} = +61^\circ$  (c = 0.74,  $CH_2Cl_2$ ).

## Results

### Mouse Neuropharmacokinetics Data.

PF-4778574: CD-1 Mouse Single-dose Neuropharmacokinetics Data (0.178 mg/kg, SC)

| Time (h) | Cp (ng/mL) |      |      |    | Cb (ng/g) |      |      |    | Cb,u (nM) |       |       |    |
|----------|------------|------|------|----|-----------|------|------|----|-----------|-------|-------|----|
|          | #1M        | #2M  | Mean | SD | #1M       | #2M  | Mean | SD | #1M       | #2M   | Mean  | SD |
| 0.5      | 15.1       | 16.3 | 15.7 |    | 18.3      | 19.3 | 18.8 |    | 0.914     | 0.964 | 0.939 |    |
| fu,p     | 0.0570     |      |      |    |           |      |      |    |           |       |       |    |
| fu,b     | 0.0195     |      |      |    |           |      |      |    |           |       |       |    |
| MW       | 390.5      |      |      |    |           |      |      |    |           |       |       |    |

PF-4778574: C57BL/6J Mouse Single-dose Neuropharmacokinetics Data (0.178 mg/kg, SC)

| Time (h) | Cp (ng/mL) |      |      |      | Cb (ng/g) |      |      |      | Cb,u (nM) |     |      |      |      |      |      |
|----------|------------|------|------|------|-----------|------|------|------|-----------|-----|------|------|------|------|------|
|          | #1M        | #2M  | #3M  | Mean | SD        | #1M  | #2M  | #3M  | Mean      | SD  | #1M  | #2M  | #3M  | Mean | SD   |
| 0.5      | 31.4       | 28.1 | 18.9 | 26.1 | 6.5       | 24.7 | 29.1 | 37.6 | 30.5      | 6.6 | 1.23 | 1.45 | 1.88 | 1.52 | 0.33 |
| fu,p     | ND         |      |      |      |           |      |      |      |           |     |      |      |      |      |      |
| fu,b     | 0.0195     |      |      |      |           |      |      |      |           |     |      |      |      |      |      |
| MW       | 390.5      |      |      |      |           |      |      |      |           |     |      |      |      |      |      |

ND = Not determined

Shaffer CL, Hurst RS, Scialis RJ, Osgood SM, Bryce DK, Hoffmann WE, Lazzaro JT, Hanks AN, Lotarski S, Weber ML, Liu J, Menniti FS, Schmidt CJ and Hajós M  
 Positive Allosteric Modulation of AMPA Receptors From Efficacy to Toxicity: The Interspecies Exposure-Response Continuum of the Novel Potentiator PF-4778574  
 The Journal of Pharmacology and Experimental Therapeutics

## Sprague-Dawley Rat Neuropharmacokinetics Data.

### PF-4778574: Sprague-Dawley Rat Single-dose Neuropharmacokinetics Data (1 mg/kg, SC)

|                    |         | Plasma                    | Brain                    | CSF                         | Plasma                   | Brain                    | CSF                      |
|--------------------|---------|---------------------------|--------------------------|-----------------------------|--------------------------|--------------------------|--------------------------|
| Time (h)           |         | C <sub>p</sub><br>(ng/mL) | C <sub>b</sub><br>(ng/g) | C <sub>CSF</sub><br>(ng/mL) | C <sub>p,u</sub><br>(nM) | C <sub>b,u</sub><br>(nM) | C <sub>CSF</sub><br>(nM) |
| 0.25               |         | 105                       | 70.3                     | 2.66                        | 12.8                     | 3.51                     | 6.81                     |
| 0.5                |         | 69.4                      | 70.2                     | 2.21                        | 8.46                     | 3.51                     | 5.66                     |
| 1.0                |         | 61.7                      | 66.4                     | 2.01                        | 7.52                     | 3.32                     | 5.15                     |
| 2.0                |         | 19.9                      | 31.8                     | 0.930                       | 2.43                     | 1.59                     | 2.38                     |
| 4.0                |         | <LLOQ                     | <LLOQ                    | <LLOQ                       |                          |                          |                          |
| 8.0                |         | <LLOQ                     | <LLOQ                    | <LLOQ                       |                          |                          |                          |
| AUC <sub>0-2</sub> | ng*h/mL | 122                       | 131                      | 3.46                        |                          |                          |                          |
| AUC Extrap         | ng*h/mL | 131                       | 150                      | 5.40                        |                          |                          |                          |
| C <sub>max</sub>   | ng/mL   | 105                       | 70.3                     | 2.66                        |                          |                          |                          |
| T <sub>max</sub>   | h       | 0.3                       | 0.3                      | 0.3                         |                          |                          |                          |
| t <sub>1/2</sub>   | h       | 0.7                       | 0.8                      | 1.3                         |                          |                          |                          |
| f <sub>u,p</sub>   | 0.0476  |                           |                          |                             |                          |                          |                          |
| f <sub>u,b</sub>   | 0.0195  |                           |                          |                             |                          |                          |                          |
| MW                 | 390.5   |                           |                          |                             |                          |                          |                          |

LLOQ = Lower limit of quantification

Shaffer CL, Hurst RS, Scialis RJ, Osgood SM, Bryce DK, Hoffmann WE, Lazzaro JT, Hanks AN, Lotarski S, Weber ML, Liu J, Menniti FS, Schmidt CJ and Hajós M  
 Positive Allosteric Modulation of AMPA Receptors From Efficacy to Toxicity: The Interspecies Exposure-Response Continuum of the Novel Potentiator PF-4778574  
 The Journal of Pharmacology and Experimental Therapeutics

## Sprague-Dawley Rat Single Intravenous Bolus Pharmacokinetics Data.

PF-4778574: Sprague-Dawley Rat Single IV Bolus Pharmacokinetics Data (0.2 mg/kg)

| Time (h)         | Cp (ng/mL) |       |       |      |      | Cb,u (nM) |       |       |       |       |
|------------------|------------|-------|-------|------|------|-----------|-------|-------|-------|-------|
|                  | #1M        | #2M   | #3M   | Mean | SD   | #1M       | #2M   | #3M   | Mean  | SD    |
| 0.083            | 40.4       | 26.9  | 42.4  | 36.6 | 8.4  | 2.17      | 1.44  | 2.27  | 1.96  | 0.45  |
| 0.167            | 28.6       | 16.5  | 31.3  | 25.5 | 7.9  | 1.53      | 0.885 | 1.68  | 1.37  | 0.42  |
| 0.25             | 22.3       | 12.2  | 19.2  | 17.9 | 5.2  | 1.20      | 0.654 | 1.03  | 0.960 | 0.277 |
| 0.5              | 9.83       | 6.30  | 8.56  | 8.23 | 1.79 | 0.527     | 0.338 | 0.459 | 0.441 | 0.096 |
| 1                | 2.96       | 0.985 | 2.27  | 2.07 | 1.00 | 0.159     | 0.053 | 0.122 | 0.111 | 0.054 |
| 2                | <LLOQ      | <LLOQ | <LLOQ |      |      |           |       |       |       |       |
| 4                | <LLOQ      | <LLOQ | <LLOQ |      |      |           |       |       |       |       |
| 6                | <LLOQ      | <LLOQ | <LLOQ |      |      |           |       |       |       |       |
| 8                | <LLOQ      | <LLOQ | <LLOQ |      |      |           |       |       |       |       |
| 12               | <LLOQ      | <LLOQ | <LLOQ |      |      |           |       |       |       |       |
| fu,p             | 0.0476     |       |       |      |      |           |       |       |       |       |
| fu,b             | 0.0195     |       |       |      |      |           |       |       |       |       |
| MW               | 390.5      |       |       |      |      |           |       |       |       |       |
| SD rat Cb,u:Cp,u | 0.44       |       |       |      |      |           |       |       |       |       |

LLOQ = Lower limit of quantification

## Beagle Dog Single Oral Dose Pharmacokinetics Data.

### PF-4778574: Beagle Dog Single Oral Dose Pharmacokinetics Data (0.1 mg/kg)

| Time (h) | Cp (ng/mL) |      |      |    | Cb,u (nM) |      |      |    |
|----------|------------|------|------|----|-----------|------|------|----|
|          | #1M        | #2F  | Mean | SD | #1M       | #2F  | Mean | SD |
| 0.25     | 2.80       | 42.4 | 22.6 |    | 0.250     | 3.79 | 2.02 |    |
| 0.5      | 6.05       | 66.0 | 36.0 |    | 0.541     | 5.90 | 3.22 |    |
| 1        | 46.0       | 39.8 | 42.9 |    | 4.12      | 3.56 | 3.84 |    |
| 2        | 31.5       | 27.0 | 29.3 |    | 2.82      | 2.42 | 2.62 |    |
| 4        | 24.3       | 17.6 | 21.0 |    | 2.17      | 1.57 | 1.87 |    |

fu,p 0.0685  
 fu,b ND  
 MW 390.5  
 Beagle dog Cb,u:Cp,u 0.51

### PF-4778574: Beagle Dog Single Oral Dose Pharmacokinetics Data (0.2 mg/kg)

| Time (h) | Cp (ng/mL) |      |    | Cb,u (nM) |      |    |
|----------|------------|------|----|-----------|------|----|
|          | #3F        | Mean | SD | #3F       | Mean | SD |
| 0.25     | 20.9       |      |    | 1.87      |      |    |
| 0.5      | 122        |      |    | 10.9      |      |    |
| 1        | 121        |      |    | 10.8      |      |    |
| 2        | 67.1       |      |    | 6.00      |      |    |
| 4        | 39.4       |      |    | 3.52      |      |    |

fu,p 0.0685  
 fu,b ND  
 MW 390.5  
 Beagle dog Cb,u:Cp,u 0.51

### PF-4778574: Beagle Dog Single Oral Dose Pharmacokinetics Data (0.25 mg/kg)

| Time (h) | Cp (ng/mL) |      |    | Cb,u (nM) |      |    |
|----------|------------|------|----|-----------|------|----|
|          | #4M        | Mean | SD | #4M       | Mean | SD |
| 0.25     | 98.2       |      |    | 8.79      |      |    |
| 0.5      | 174        |      |    | 15.6      |      |    |
| 1        | 154        |      |    | 13.8      |      |    |
| 2        | 135        |      |    | 12.1      |      |    |
| 4        | 70.5       |      |    | 6.31      |      |    |

fu,p 0.0685  
 fu,b ND  
 MW 390.5  
 Beagle dog Cb,u:Cp,u 0.51

ND = not determined

## Cynomolgus Monkey Single Subcutaneous Dose Pharmacokinetics Data.

### PF-4778574: Cynomolgus Monkey Single Subcutaneous Dose Pharmacokinetics Data (0.1 mg/kg)

| Time (h) | Cp (ng/mL) |       |      |    | Cb,u (nM) |       |       |    |
|----------|------------|-------|------|----|-----------|-------|-------|----|
|          | #3M        | #4M   | Mean | SD | #3M       | #4M   | Mean  | SD |
| 0.25     | 11.9       | 5.65  | 8.78 |    | 1.95      | 0.925 | 1.44  |    |
| 0.5      | 22.1       | 15.4  | 18.8 |    | 3.62      | 2.52  | 3.07  |    |
| 1        | 29.1       | 20.9  | 25.0 |    | 4.77      | 3.42  | 4.09  |    |
| 2        | 24.5       | 21.9  | 23.2 |    | 4.01      | 3.59  | 3.80  |    |
| 4        | 9.20       | 8.01  | 8.6  |    | 1.51      | 1.31  | 1.41  |    |
| 6        | 3.06       | 2.70  | 2.9  |    | 0.501     | 0.44  | 0.472 |    |
| 24       | <LLOQ      | <LLOQ |      |    |           |       |       |    |

fu,p 0.0876  
 fu,b ND  
 MW 390.5  
 Cynomolgus monkey Cb,u:Cp,u 0.73

### PF-4778574: Cynomolgus Monkey Single Subcutaneous Dose Pharmacokinetics Data (0.32 mg/kg)

| Time (h) | Cp (ng/mL) |       |      |    | Cb,u (nM) |        |      |    |
|----------|------------|-------|------|----|-----------|--------|------|----|
|          | #1M        | #2M   | Mean | SD | #1M       | #2M    | Mean | SD |
| 0.25     | 37.4       | 9.44  | 23.4 |    | 6.12      | 1.55   | 3.84 |    |
| 0.5      | 80.5       | 20.3  | 50.4 |    | 13.2      | 3.32   | 8.25 |    |
| 1        | 109        | 30.0  | 69.5 |    | 17.8      | 4.91   | 11.4 |    |
| 2        | 147        | 57.3  | 102  |    | 24.1      | 9.38   | 16.7 |    |
| 4        | 136        | 48.7  | 92.4 |    | 22.3      | 7.98   | 15.1 |    |
| 6        | 114        | 40.4  | 77.2 |    | 18.7      | 6.62   | 12.6 |    |
| 24       | 23.1       | 0.497 | 11.8 |    | 3.78      | 0.0814 | 1.93 |    |

fu,p 0.0876  
 fu,b ND  
 MW 390.5  
 Cynomolgus monkey Cb,u:Cp,u 0.73

ND = Not determined

LLOQ = Lower limit of quantification
